# Supplementary material
Source: publisher figshare collection journal article supplement (https://acs.figshare.com/ndownloader/files/4137307)
Supplement: Supplementary file 1 [file 4137307]

## Supporting information (SI)

### Arsenic dynamics in mangrove sediments: the Sundarbans, Bangladesh-Part 1

Mahmud Hossain, Paul N Williams, Mestrot Adrien, Gareth J. Norton, Claire M.

Deacon, Andrew A. Meharg

#### Contents

|              |                                                                                                                                                   |
|--------------|---------------------------------------------------------------------------------------------------------------------------------------------------|
| Figure SI 1  | Core sampling locations in the Sundarbans overlain with the DPHE-BGS-DFID groundwater As map of Bangladesh.                                       |
| Figure SI 2  | Sampling sites at Koromjal                                                                                                                        |
| Figure SI 3  | Particle size analysis of Mongla, Dacope and Shyamnagar core sediments overlain with total As and TOC concentration for each sediment core slice. |
| Figure SI 4  | Regression plots showing relation between particle size and total As.                                                                             |
| Figure SI 5  | Sequentially extracted different fractions of As in sediments with their percentage of totals.                                                    |
| Figure SI 6  | Particle size percentage overlain with TOC and total As in sediments of 4 different cites at Koromjal.                                            |
| Figure SI 7  | Regression plots showing relations between particle size percentage, total As, TOC and total Fe from sediments.                                   |
| Figure SI 8  | Correlation between porewater As, DOC, Fe and Mn.                                                                                                 |
| Figure SI 9  | Total As and DOC in surface water collected from 4 sites at Koromjal on 19 December, 2009.                                                        |
| Figure SI 10 | Arsenic and DOC in tidal seawater collected from Koromjal, the Sundarbans, Bangladesh.                                                            |
| Figure SI 11 | Arsenic speciation in porewater collected from 4 sites at Koromjal on 18 December 2009.                                                           |
| Table SI 1   | Correlation matrix of elemental concentrations in Mongla, Dacope and Shyamnagar core sediments                                                    |
| Table SI 2   | Sediments settled on synthetic turf after two tidal cycles at Koromjal.                                                                           |
| Table SI 3   | Correlation matrix of elemental concentrations at Koromjal core sediments.                                                                        |
| Text SI      | Additional methods                                                                                                                                |

9

10

11

12

13

14

15

16

17

18

19

20

21

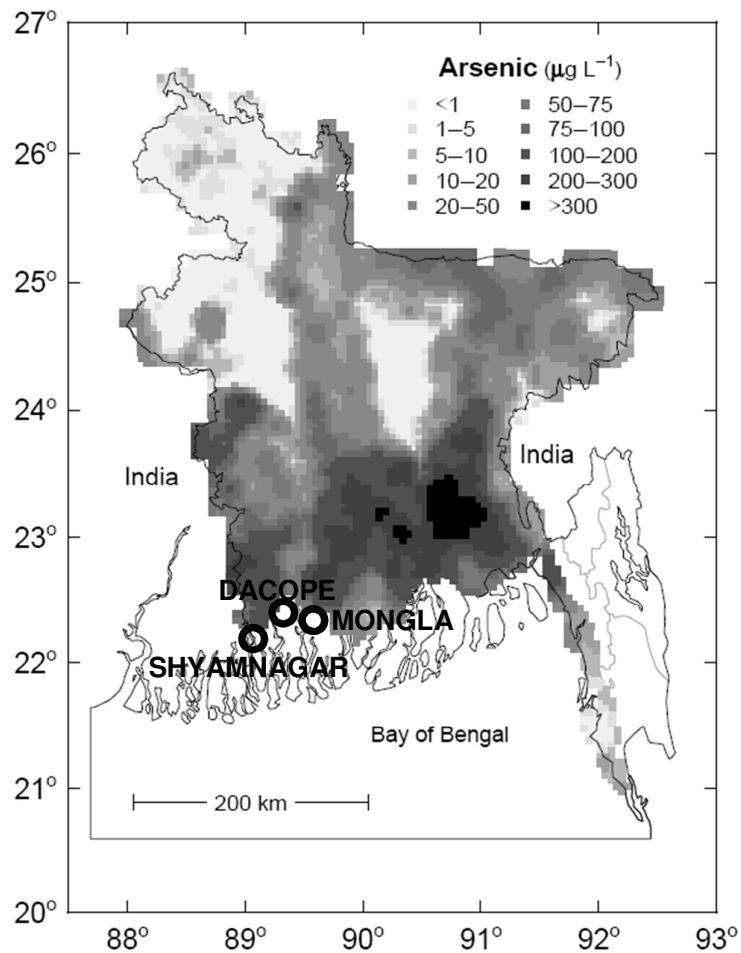

Figure SI 1. Core sampling locations in the Sundarbans overlain with the DPHE-BGS-DFID groundwater As map of Bangladesh (1).

24

25

26

27

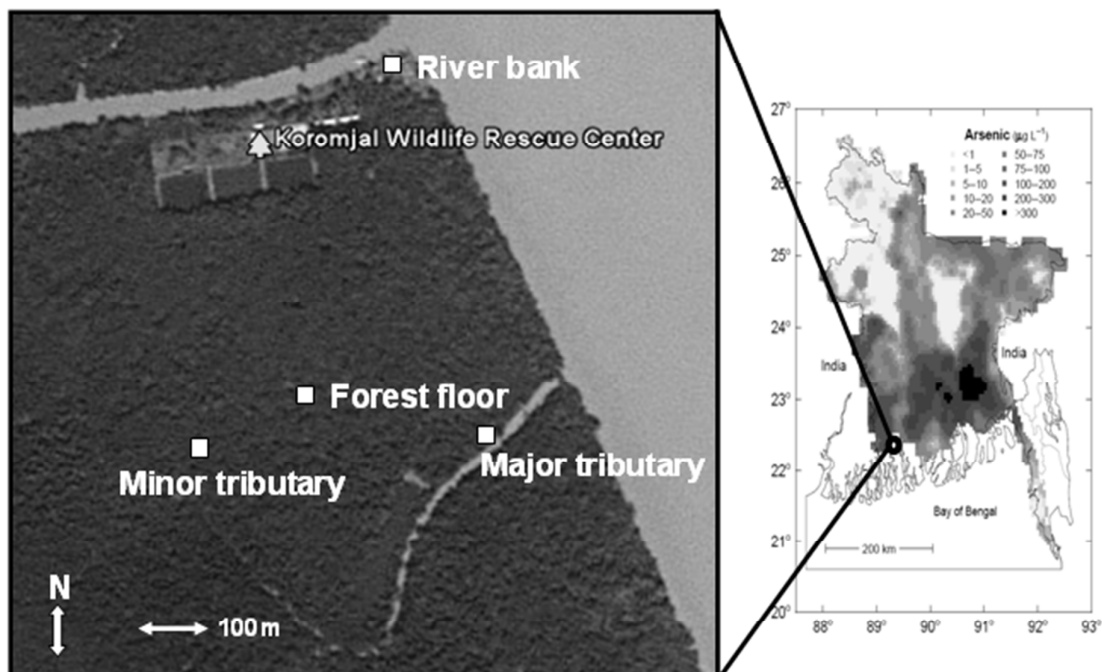

28

29 Figure SI 2. Sampling sites at Koromjal are denoted by squares. Koromjal, the  
 30 Sundarbans is further pointed on the groundwater As map of Bangladesh published  
 31 by the DPHE-BGS-DFID (1). Unshaded Sundarbans and some hilly districts of  
 32 Bangladesh indicate unavailability of data.

### MONGLA

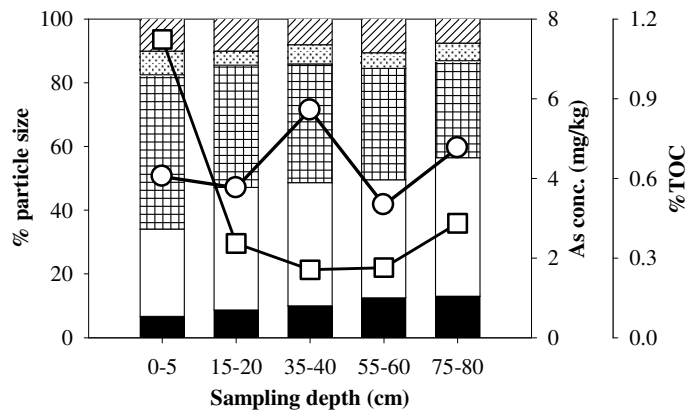

### DACOPE

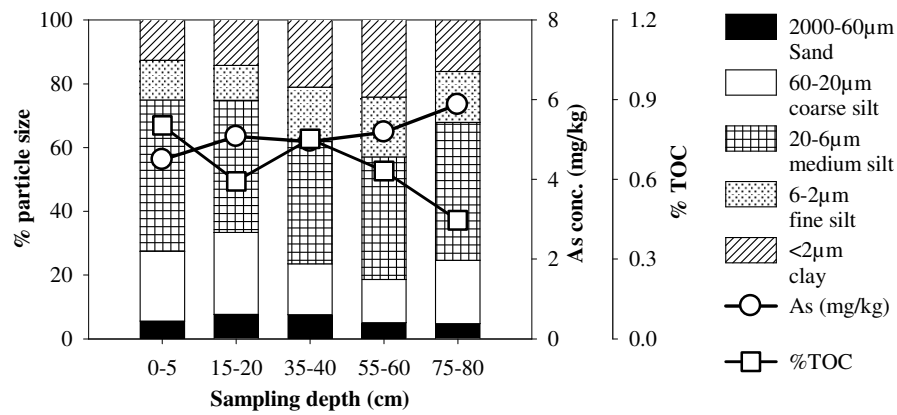

### SHYAMNAGAR

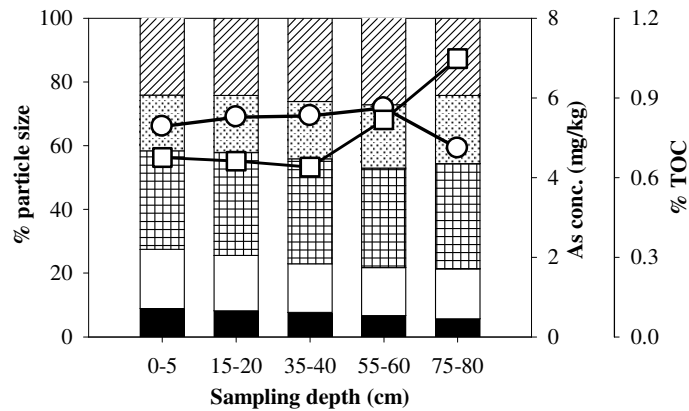

33 Figure SI 3. Particle size analysis of Mongla, Dacope and Shyamnagar core  
 34 sediments plotted as stacked bars, overlain with total As and TOC concentration for  
 35 each sediment core slice.

37

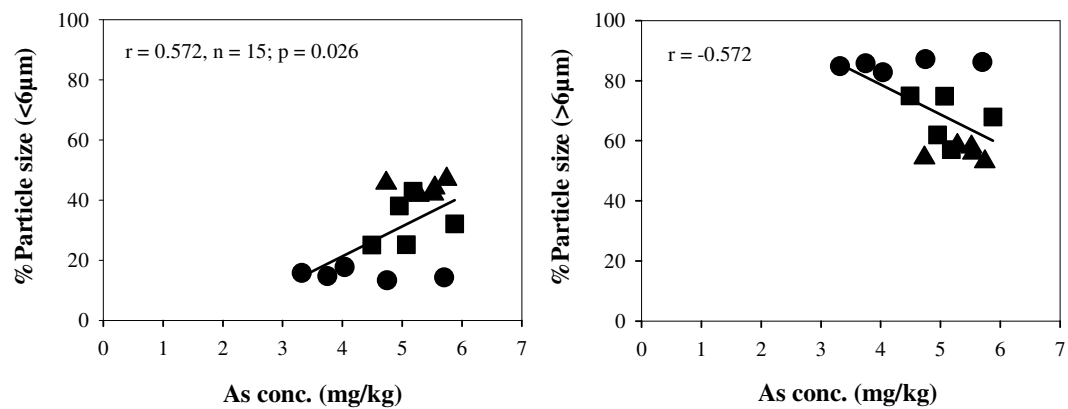

38

39 Figure SI 4. Regression plots showing relation between particle size and total As.

40 Closed circle, square and triangle represent Mongla, Dacope and Shyamnagar

41 sediments respectively.

42

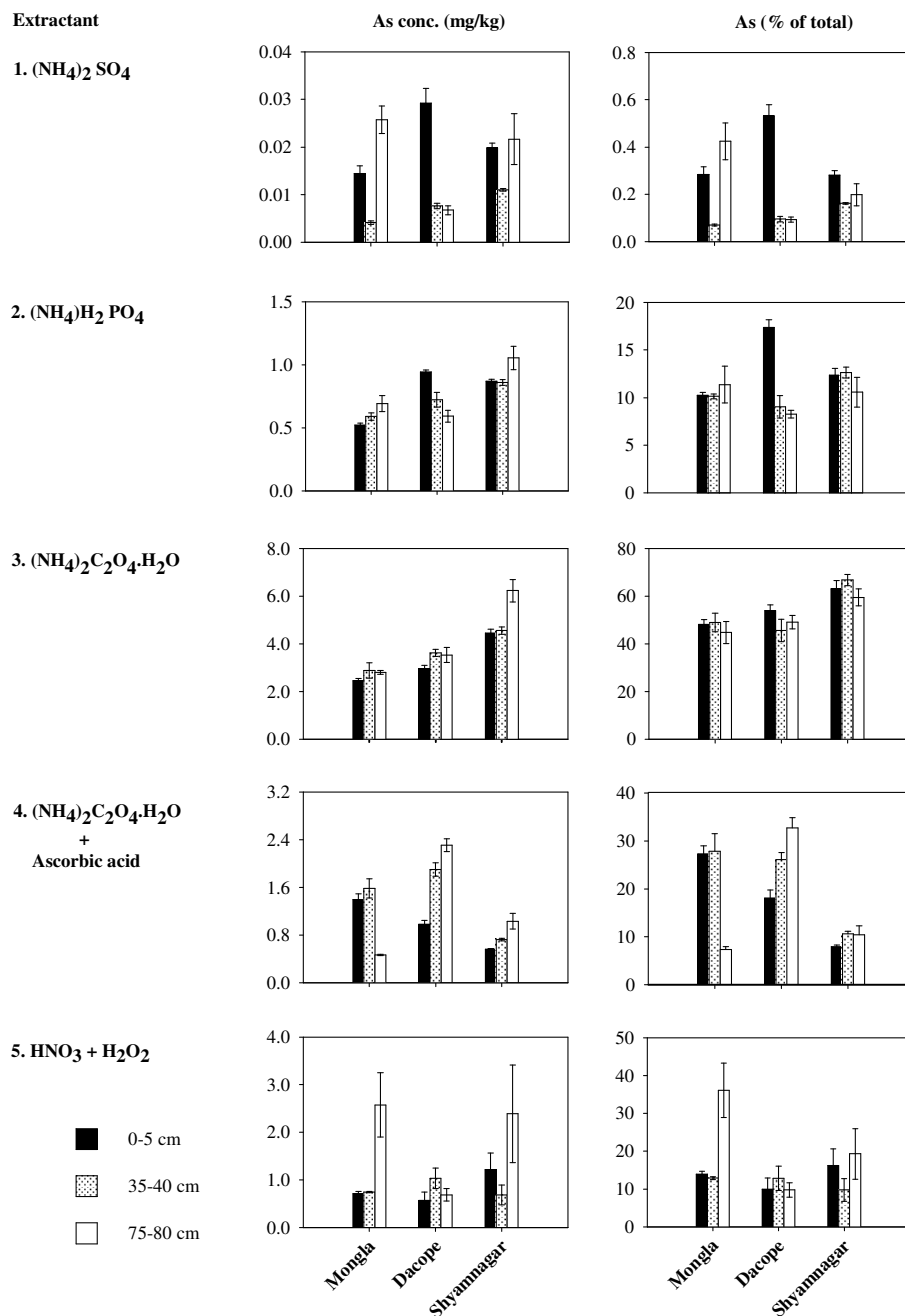

43 Figure SI 5. Sequentially extracted different fractions of As in Mongla, Dacope and  
 44 Shyamnagar sediments with their percentage of total As. Data are mean values and  
 45  $\pm$  SE (n = 6).

## RIVER BANK

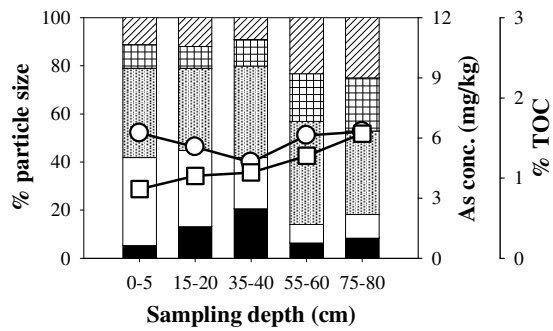

## MAJOR TRIBUTARY

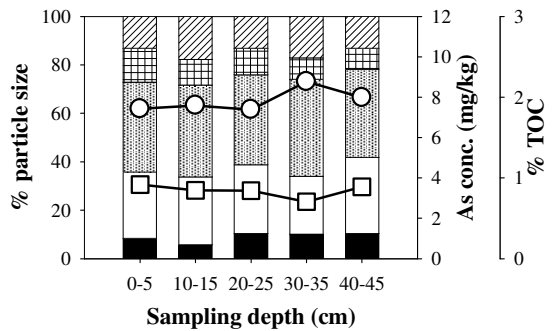

## FOREST FLOOR

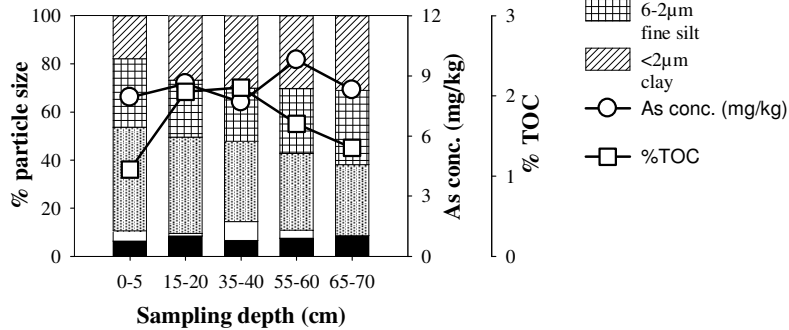

## MINOR TRIBUTARY

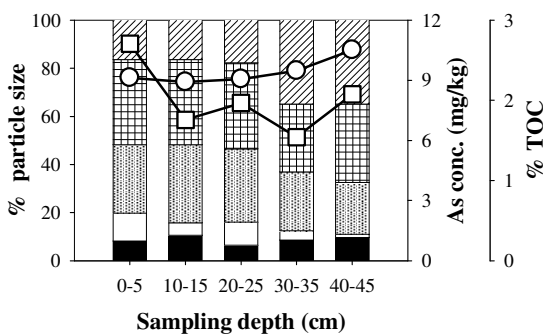

72 Figure SI 6. Particle size percentage overlain with TOC and total As in sediments of  
73 4 different cites at Koromjal.

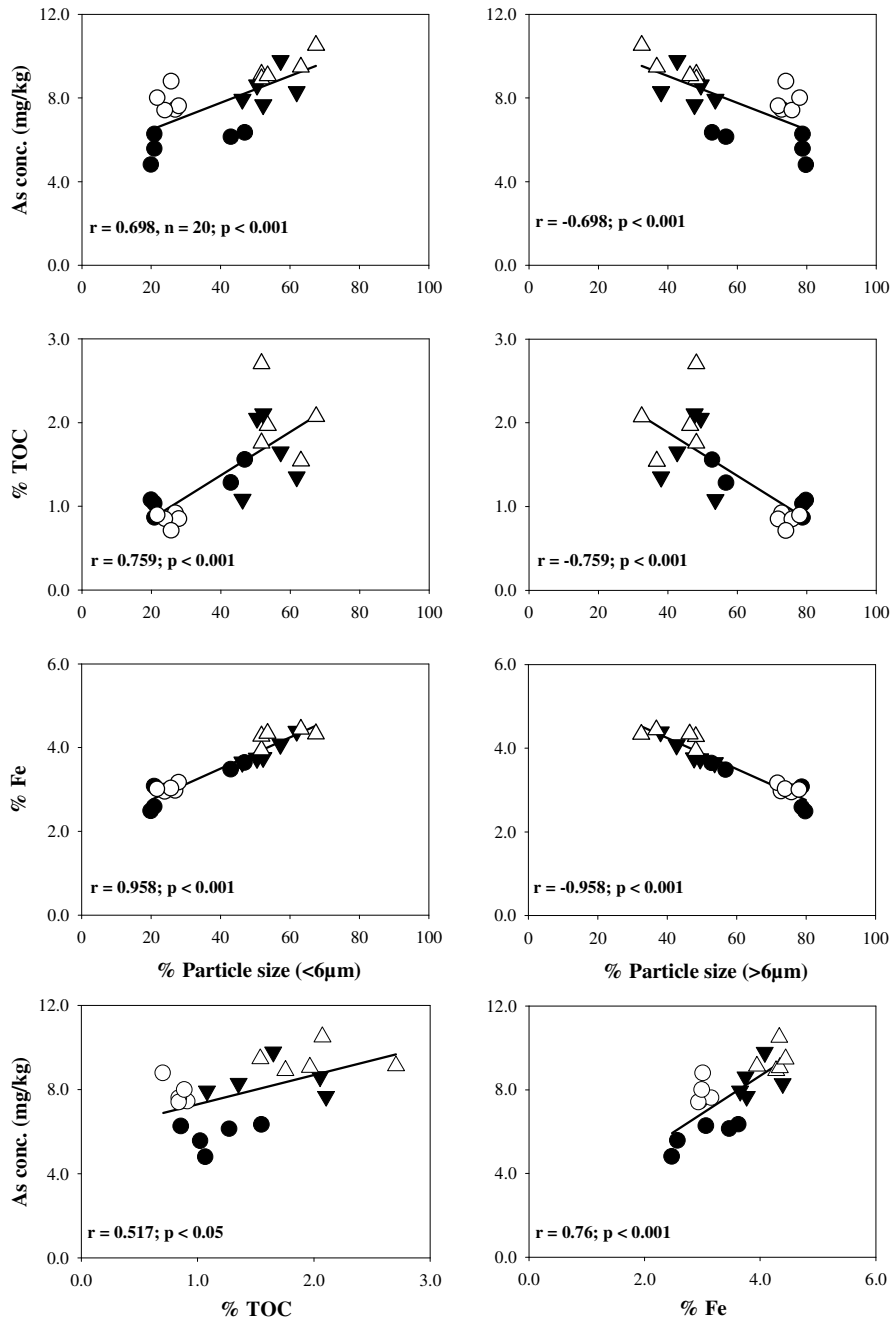

94

95 Figure SI 7. Regression plots showing relations between particle size percentage,  
 96 total As, TOC and total Fe from sediments. Closed circle represent river bank  
 97 sediments, open circle represent major tributary sediment, closed triangle down  
 98 represent forest floor sediment, open triangle up represent minor tributary sediment.



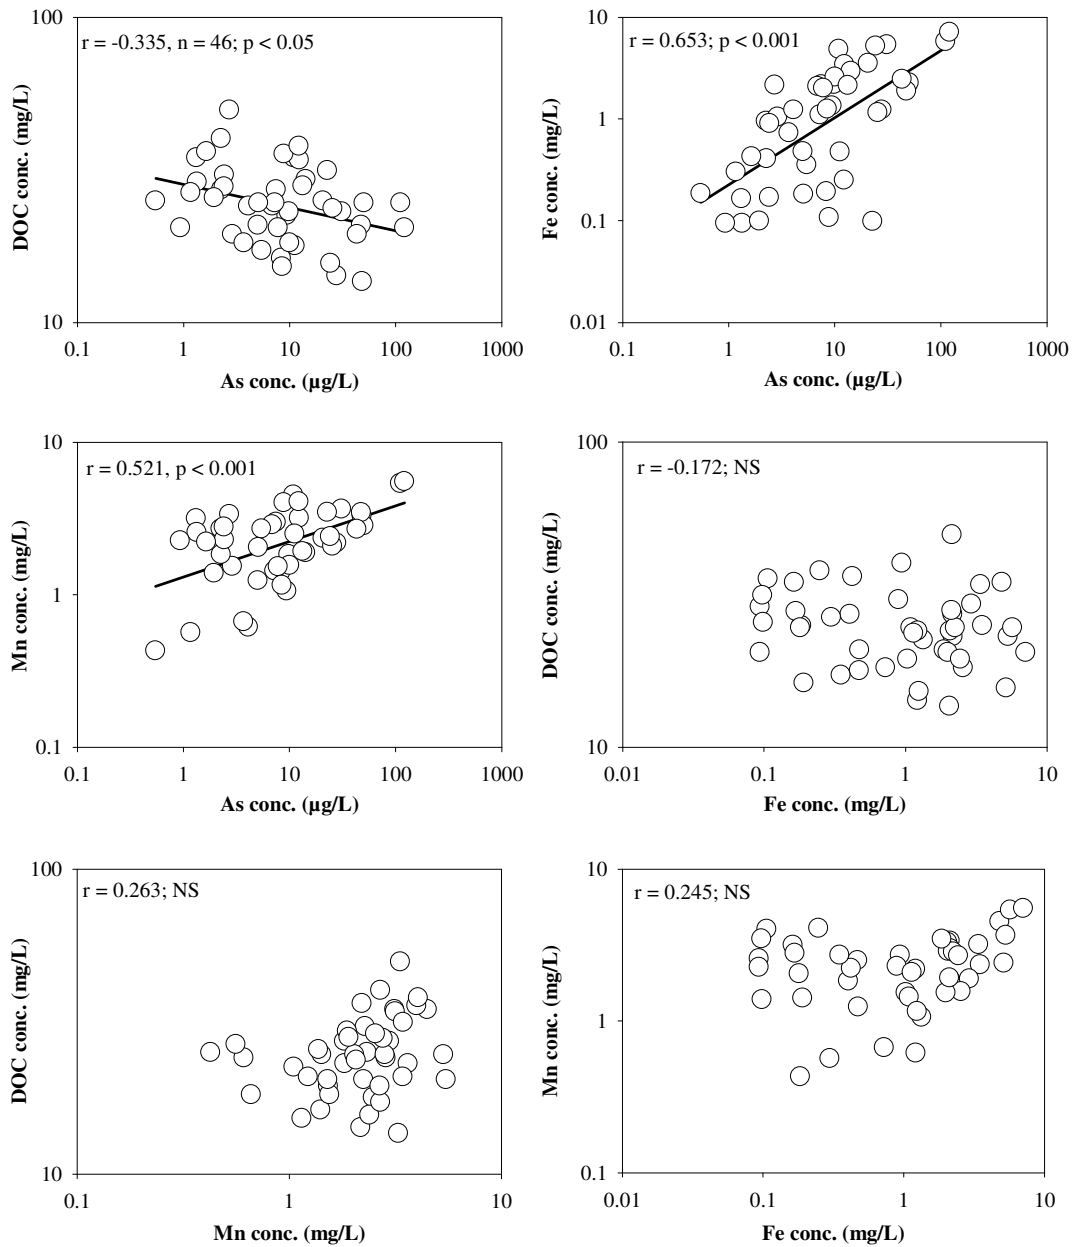

99 Figure SI 8. Correlation between porewater As, DOC, Fe and Mn at Koromjal. NS =  
100 not significant.

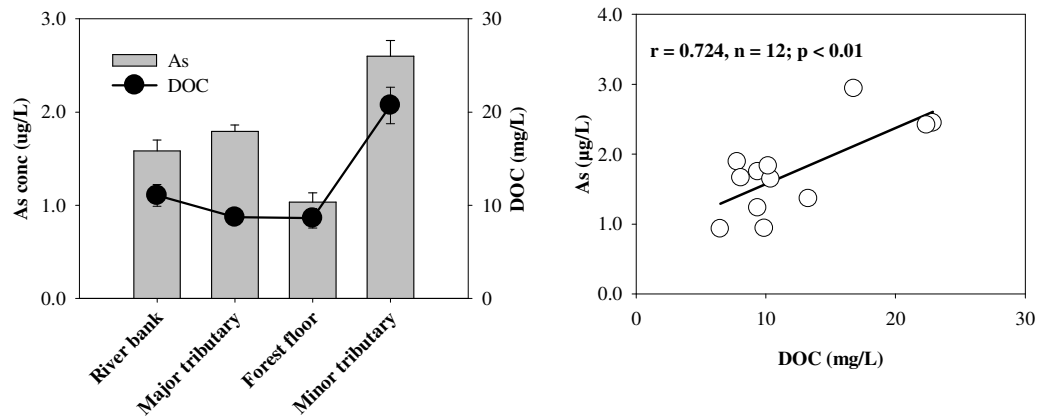

Figure SI 9. Total As and DOC in surface water collected from 4 sites at Koromjal on 19 December, 2009. Data are means and  $\pm$  SE ( $n = 3$ ).

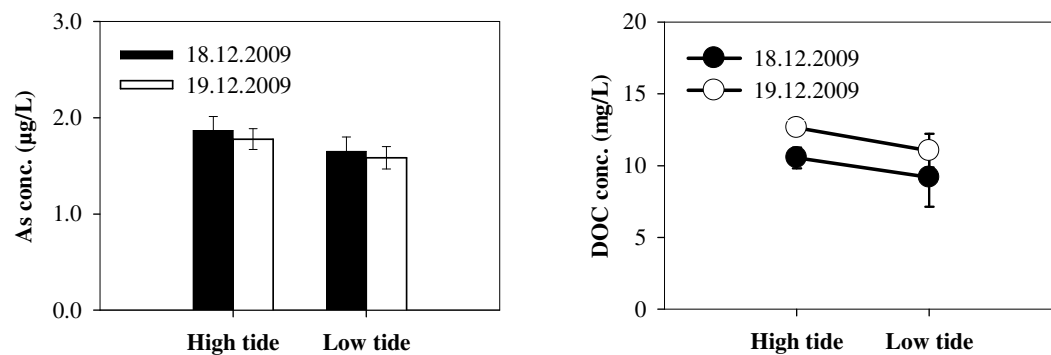

Figure SI 10. Arsenic and DOC in tidal seawater collected from Koromjal, the Sundarbans, Bangladesh. Data are means and  $\pm$  SE ( $n = 3$ ).

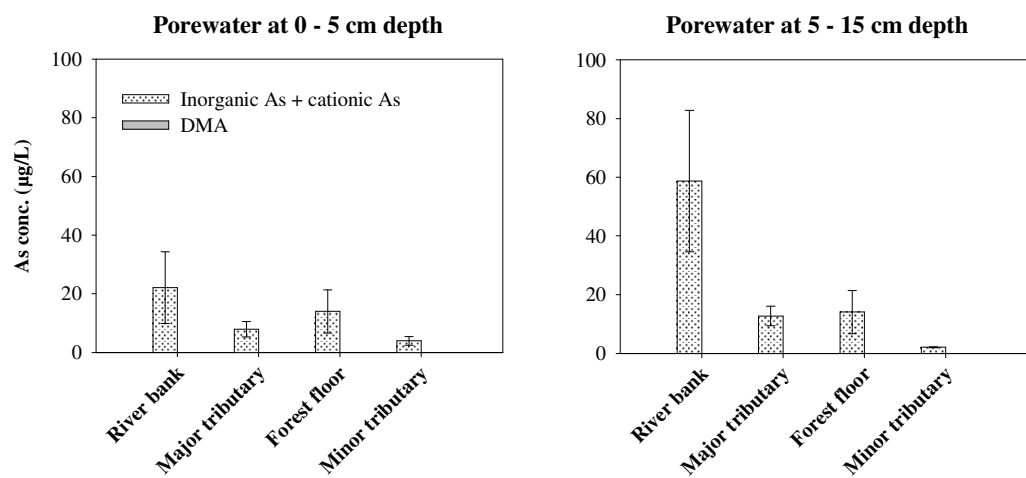

122 Figure SI. 11. Arsenic speciation in porewater collected from 4 sites at Koromjal on

123 18 December 2009. Data are means and  $\pm$  SE ( $n = 3$ ).

124

125

126 Table SI 1. Correlation matrix of elemental concentrations in Mongla, Dacope and  
 127 Shyamnagar core sediments. Each site had 3 replicate samples as described in  
 128 Materials and Methods. Cell contents are first Pearson correlation and below P-  
 129 value. Significant ( $P < 0.05$ ) relationships are shown in bold.

| <b>MONGLA</b>     | Depth<br>(cm) | As<br>(mg/kg) | TOC<br>(%)    | TIC<br>(%)    | TN<br>(%)     | C:N           | Fe<br>(%)     | Mn<br>(mg/kg) |
|-------------------|---------------|---------------|---------------|---------------|---------------|---------------|---------------|---------------|
| As                | 0.007         |               |               |               |               |               |               |               |
| (mg/kg)           | 0.970         |               |               |               |               |               |               |               |
| TOC               | <b>-0.532</b> | -0.047        |               |               |               |               |               |               |
| (%)               | <b>0.002</b>  | 0.797         |               |               |               |               |               |               |
| TIC               | 0.309         | -0.098        | <b>-0.401</b> |               |               |               |               |               |
| (%)               | 0.086         | 0.592         | <b>0.023</b>  |               |               |               |               |               |
| TN                | <b>-0.568</b> | 0.250         | <b>0.839</b>  | -0.245        |               |               |               |               |
| (%)               | <b>0.001</b>  | 0.167         | <b>0.001</b>  | 0.175         |               |               |               |               |
| C:N               | 0.243         | 0.214         | -0.329        | 0.179         | <b>-0.662</b> |               |               |               |
|                   | 0.180         | 0.240         | 0.066         | 0.326         | <b>0.001</b>  |               |               |               |
| Fe                | -0.122        | 0.323         | <b>0.385</b>  | -0.169        | 0.198         | -0.147        |               |               |
| (%)               | 0.507         | 0.072         | <b>0.030</b>  | 0.354         | 0.276         | 0.421         |               |               |
| Mn                | 0.031         | <b>0.578</b>  | 0.111         | -0.148        | -0.063        | 0.072         | <b>0.560</b>  |               |
| (mg/kg)           | 0.867         | <b>0.001</b>  | 0.547         | 0.418         | 0.731         | 0.695         | <b>0.001</b>  |               |
| P                 | -0.053        | <b>-0.370</b> | -0.035        | -0.192        | 0.159         | -0.228        | <b>-0.552</b> | <b>-0.411</b> |
| (mg/kg)           | 0.775         | <b>0.037</b>  | 0.851         | 0.293         | 0.384         | 0.210         | <b>0.001</b>  | <b>0.019</b>  |
| <b>DACOPE</b>     |               |               |               |               |               |               |               |               |
| As                | <b>0.517</b>  |               |               |               |               |               |               |               |
| (mg/kg)           | <b>0.002</b>  |               |               |               |               |               |               |               |
| TOC               | <b>-0.621</b> | <b>-0.409</b> |               |               |               |               |               |               |
| (%)               | <b>0.000</b>  | 0.020         |               |               |               |               |               |               |
| TIC               | <b>-0.616</b> | <b>-0.589</b> | 0.036         |               |               |               |               |               |
| (%)               | <b>0.001</b>  | <b>0.001</b>  | 0.847         |               |               |               |               |               |
| TN                | 0.099         | 0.036         | <b>0.460</b>  | <b>-0.443</b> |               |               |               |               |
| (%)               | 0.588         | 0.843         | <b>0.008</b>  | <b>0.011</b>  |               |               |               |               |
| C:N               | <b>-0.591</b> | <b>-0.445</b> | 0.080         | <b>0.739</b>  | <b>-0.780</b> |               |               |               |
|                   | <b>0.001</b>  | <b>0.011</b>  | 0.664         | <b>0.001</b>  | <b>0.001</b>  |               |               |               |
| Fe                | <b>0.599</b>  | <b>0.775</b>  | -0.191        | <b>-0.845</b> | <b>0.363</b>  | <b>-0.688</b> |               |               |
| (%)               | 0.000         | 0.000         | 0.296         | <b>0.001</b>  | <b>0.041</b>  | <b>0.001</b>  |               |               |
| Mn                | 0.242         | <b>0.726</b>  | -0.341        | -0.299        | -0.081        | -0.218        | <b>0.527</b>  |               |
| (mg/kg)           | 0.182         | <b>0.001</b>  | 0.056         | 0.096         | 0.658         | 0.231         | <b>0.002</b>  |               |
| P                 | -0.172        | -0.158        | -0.030        | 0.304         | -0.082        | 0.203         | -0.181        | 0.090         |
| (mg/kg)           | 0.346         | 0.388         | 0.870         | 0.091         | 0.656         | 0.264         | 0.321         | 0.623         |
| <b>SHYAMNAGAR</b> |               |               |               |               |               |               |               |               |
| As                | -0.014        |               |               |               |               |               |               |               |
| (mg/kg)           | 0.942         |               |               |               |               |               |               |               |
| TOC               | 0.338         | -0.144        |               |               |               |               |               |               |
| (%)               | 0.670         | 0.449         |               |               |               |               |               |               |
| TIC               | <b>-0.595</b> | -0.253        | -0.307        |               |               |               |               |               |
| (%)               | <b>0.001</b>  | 0.176         | 0.098         |               |               |               |               |               |
| TN                | -0.055        | 0.240         | 0.272         | -0.159        |               |               |               |               |
| (%)               | 0.772         | 0.201         | 0.146         | 0.403         |               |               |               |               |
| C:N               | -0.091        | -0.340        | 0.207         | <b>0.390</b>  | <b>-0.732</b> |               |               |               |
|                   | 0.632         | 0.066         | 0.273         | <b>0.033</b>  | <b>0.001</b>  |               |               |               |
| Fe                | -0.164        | <b>0.744</b>  | -0.311        | -0.010        | 0.052         | -0.141        |               |               |
| (%)               | 0.386         | <b>0.001</b>  | 0.095         | 0.960         | 0.785         | 0.457         |               |               |
| Mn                | <b>-0.757</b> | 0.177         | <b>-0.428</b> | 0.347         | -0.099        | 0.092         | <b>0.400</b>  |               |
| (mg/kg)           | <b>0.001</b>  | 0.350         | <b>0.018</b>  | 0.061         | 0.601         | 0.628         | <b>0.029</b>  |               |
| P                 | -0.095        | 0.311         | -0.330        | 0.127         | 0.216         | <b>-0.364</b> | 0.292         | 0.086         |
| (mg/kg)           | 0.617         | 0.095         | 0.075         | 0.502         | 0.251         | <b>0.048</b>  | 0.117         | 0.652         |

130 Table SI 2. Sediments settled on synthetic turf after two tidal cycles at Koromjal.

131 Data are means and  $\pm$  SE (n = 3).

| Sediment<br>deposits | As<br>(mg/kg)  | Fe (%)         | Mn<br>(mg/kg) | TOC (%)            | TIC (%)            |
|----------------------|----------------|----------------|---------------|--------------------|--------------------|
| River bank           | 7.3 $\pm$ 0.3  | 2.5 $\pm$ 0.04 | 541 $\pm$ 8   | 0.61 $\pm$<br>0.02 | 0.72 $\pm$<br>0.02 |
| Forest floor         | 13.1 $\pm$ 1.0 | 4.1 $\pm$ 0.1  | 884 $\pm$ 13  | 2.08 $\pm$ 0.1     | 0.70 $\pm$ 0.1     |

132

133

134

135

136

137

138

139

140

141

142

143

144

145

146

147

148

149

150

151

152

Table SI 3. Correlation matrix of elemental concentrations at Koromjal core  
sediments. Each site had 3 replicate samples as described in Materials and  
Methods. Cell contents are first Pearson correlation and below P- value. Significant  
(P<0.05) relationships are shown in bold.

| River bank      | Depth (cm)    | As (mg/kg)    | TOC (%)       | TIC (%)       | Fe (%)        |
|-----------------|---------------|---------------|---------------|---------------|---------------|
| As (mg/kg)      | 0.164         |               |               |               |               |
| % TOC           | 0.544         | 0.011         |               |               |               |
| % TIC           | <b>0.751</b>  | 0.969         |               |               |               |
| % Fe            | <b>0.001</b>  | 0.113         | <b>-0.921</b> |               |               |
| % Mn            | <b>-0.706</b> | 0.676         | <b>0.001</b>  | -0.447        |               |
|                 | <b>0.002</b>  | <b>0.522</b>  | <b>0.678</b>  | 0.082         |               |
|                 | <b>0.001</b>  | <b>0.038</b>  | <b>0.004</b>  | <b>0.516</b>  | <b>-0.546</b> |
|                 | <b>-0.841</b> | -0.132        | -0.512        | <b>0.041</b>  | <b>0.029</b>  |
|                 | <b>0.001</b>  | 0.627         | 0.969         |               |               |
| Major tributary |               |               |               |               |               |
| As (mg/kg)      | 0.437         |               |               |               |               |
| % TOC           | 0.206         | -0.212        |               |               |               |
| % TIC           | -0.135        | 0.557         |               |               |               |
| % Fe            | 0.709         | 0.281         | <b>-0.852</b> |               |               |
| % Mn            | 0.383         | 0.432         | <b>0.002</b>  |               |               |
|                 | 0.274         | 0.192         | -0.178        | 0.221         |               |
|                 | -0.195        | 0.595         | 0.623         | 0.539         |               |
|                 | 0.590         | -0.230        | 0.188         | -0.300        | 0.410         |
|                 | <b>-0.799</b> | 0.523         | 0.603         | 0.400         | 0.240         |
|                 | <b>0.006</b>  |               |               |               |               |
| Forest floor    |               |               |               |               |               |
| As (mg/kg)      | <b>0.567</b>  |               |               |               |               |
| % TOC           | 0.035         | 0.235         |               |               |               |
| % TIC           | 0.234         | 0.418         |               |               |               |
| % Fe            | 0.421         | -0.286        | -0.431        |               |               |
| % Mn            | -0.327        | 0.321         | 0.124         |               |               |
|                 | 0.254         | -0.027        | -0.385        |               |               |
|                 | <b>0.885</b>  | <b>0.557</b>  | 0.927         | 0.174         |               |
|                 | <b>0.001</b>  | <b>0.038</b>  | 0.204         | <b>-0.803</b> |               |
|                 | <b>-0.906</b> | <b>-0.581</b> | 0.408         | 0.485         | <b>0.001</b>  |
|                 | <b>0.001</b>  | <b>0.029</b>  |               |               |               |
| Minor tributary |               |               |               |               |               |
| As (mg/kg)      | 0.458         |               |               |               |               |
| % TOC           | 0.184         | 0.458         |               |               |               |
| % TIC           | 0.067         | 0.184         |               |               |               |
| % Fe            | 0.855         | -0.471        | <b>-0.675</b> |               |               |
| % Mn            | -0.129        | 0.169         | <b>0.032</b>  |               |               |
|                 | 0.721         | -0.536        | <b>-0.840</b> | 0.612         |               |
|                 | 0.237         | 0.110         | 0.002         | 0.060         |               |
|                 | 0.51          | -0.543        | -0.263        | 0.262         | 0.087         |
|                 | <b>-0.832</b> | 0.105         | 0.462         | 0.464         | 0.811         |
|                 | <b>0.003</b>  |               |               |               |               |

## Text SI Additional methods

Aristar<sup>®</sup> reagents were used throughout, supplied by BDH (Poole, Dorset, UK), along with high purity 18.2 MΩ cm water (Milli-Q<sup>®</sup>).

Sediment core slices were oven dried at 60 °C for 24 h and then sediment was ground, sieved (2 mm), and digested with HNO<sub>3</sub> and H<sub>2</sub>O<sub>2</sub> at 120 °C on a block digester (**Error! Reference source not found.**). Soil certified reference material (CRM) (NCS-ZC-73007), spikes and sample blanks were included in each digestion batch of 40 samples with randomization as part of the quality control. Total As (m/z 75) and Indium (In)(m/z 115) analysis was determined by ICP-MS (Agilent technologies 7500, Tokyo, Japan); the instrument was tuned for the monitoring of m/z 75 (As) and m/z 77 and 82 (Selenium) (m/z 77 and m/z 78 while collision cell was used) to check ArCl interferences. Indium (10 µg/L) was run as internal standard. Standards were prepared from 1000 mg/L ICP-MS grade multi-element stock solutions with appropriate ranges (0 - 50 µg/L). Corrections were not required for polyatomic Ar<sup>40</sup>Cl<sup>35</sup> interferences on m/z 75. Total Fe and Mn analysis was conducted by flame-atomic absorption spectrophotometry (Perkin Elmer AAnalyst 300), calibrated with appropriate standards and change in sensitivity of the instrument checked every 12 samples. A subset of samples were digested for total P analysis using a sulphuric acid,/lithium sulphate,/hydrogen peroxide mixture in 84:2.4:70 ratio, with total P determined by flow injection colourimetry (FIAstar 5000 Analyzer, FOSS Tecator, Sweden). A further subset of sediments was ball-milled (Retsch, Germany) and analyzed for total carbon (TC), total organic carbon (TOC)



and total nitrogen (TN) by flash combustion (NA 1500 Series 2, Fisons Instruments, UK).

Porewater, surface water and tidal seawater samples were analyzed for As using ICP-MS as mentioned previously. Porewaters collected on 18 December, 2009 were characterized for As speciation using an anion exchange HPLC (PRP X-100, Hamilton, Switzerland) coupled to ICP-MS Agilent 7500c with 6.6 mM phosphate buffer (pH = 6.2).

Arsenic in DGT was determined by ICP-MS (Thermo Elemental X7). The concentration of labile As trapped by DGT ( $^{As}C_{DGT}$ ) was calculated using equation [i].

$$^{As}C_{DGT} = M \times \Delta g / (D \times A \times t) \quad \text{---} \quad \text{---} \quad \text{---} \quad [i]$$

Where  $M$  is the mass of As in the binding (ferrihydrite) gel,  $\Delta g$  is the thickness of the diffusive gel (0.08 cm) plus the thickness of the filter membrane (0.014 cm),  $A$  is the surface area (2.54 cm<sup>2</sup>),  $t$  is the deployment time (24 h), and  $D$  is the temperature corrected diffusion coefficient of As in the gel (**Error! Reference source not found.**).  $^{As}C_{DGT}$  was compared with porewater As concentrations collected on the same day.

206 DOC in water samples was analyzed by LabTOC-Aqueous Carbon Analyzer (PPM  
207 Ltd., UK) with necessary dilutions for porewaters. Total Fe and Mn in water samples  
208 were analysed by flame-AAS with appropriate dilutions. Fe and Mn concentrations in  
209 porewater were well above the limit of detection (LOD) but all surface water and tidal  
210 seawater fell below the LOD.

211

## 212 ***Statistics***

213 All statistical analysis was performed using general linear modeling (GLM) using  
214 Minitab v.15 English (State College, PA).

215

## 216 ***Rhizon samplers***

217 Rhizosphere Research Products, Dolderstraat 62, NL-6706, JG Wageningen, The  
218 Netherlands

219

## 220 ***Sediment particle size analysis***

221 A subset of sections from each core profile were selected for particle size analysis.  
222 Sediment (25 g) was mixed with 1 L of deionized water with 5 mL dispersant (mixture  
223 of sodium polyphosphate and sodium carbonate, buffered at pH 8.3). A hydrometer  
224 (g/L. T: 68 °F Zeal, Soil Hydrometer No.2/7243 ASTM. 152H, 0 - 60) was inserted  
225 into the suspension and readings were recorded at 46 s, 6 min 51 s, 76 min and 11.5  
226 h with corresponding temperature (°C) reading to determine particles within the  
227 equivalent spherical diameter (e.s.d.) ranges of 2000 - 60 µm (sand), 60 - 20 µm

(coarse silt), 20 - 6  $\mu\text{m}$  (medium silt), 6 - 2  $\mu\text{m}$  (fine silt) and < 2  $\mu\text{m}$  (clay), respectively (**Error! Reference source not found.**). Particle size analysis of tidally deposited sediment could not be conducted due to the small sample size obtained.

### *Sequential extraction*

Arsenic fractionation study of sediments was conducted following a published method (**Error! Reference source not found.**) using 0.05 M ammonium sulphate ( $(\text{NH}_4)_2\text{SO}_4$ , 0.05 M ammonium dihydrogen phosphate  $(\text{NH}_4)_2\text{H}_2\text{PO}_4$ , 0.2 M ammonium-oxalate, 0.02 M; pH 3.25 ammonium-oxalate buffer + 0.1 M ascorbic acid and finally microwave digestion with  $\text{HNO}_3$  following the procedures as described by Adomako et al. (4). Extractants collected after five consecutive extractions represents (I) non-specifically adsorbed As, (II) specifically adsorbed As, (III) amorphous and poorly-crystalline hydrous oxides bound As, (IV) crystalline hydrous oxides bound As, and (V) residual As. Soil extracts were collected in 50 mL centrifuge tubes and centrifuged at 1720 x g for 10 minutes and the supernatant carefully decanted into 50 mL tube and stored at 20 °C for analysis. Soil extracts were treated with 20 % potassium iodide (KI) solution (20 % KI, 10 % ascorbic acid and 20 % HCl) about 30 minutes prior to analysis for reduction of arsenate (AsV) into arsenite (AsIII) and AsIII in extracts were determined by a Hydride generator Atomic Absorption Spectrophotometer (HG-AAS) using matrix match AsIII standards. Sample spikes (10  $\mu\text{g/L}$ ) and blanks were run with each analytical batch.

## **References**

- 251 1. BGS (British Geological Survey). *Arsenic contamination of groundwater in*  
252 *Bangladesh*, Final Report. British Geological Survey Technical Report  
253 WC/00/19; Kinniburgh DG and Smedley PL, Eds.; British Geological Survey:  
254 Keyworth, **2001**; Vol. 2, Web:  
255 <http://www.bgs.ac.uk/arsenic/bphase1/bintro.htm>.
- 256 2. BSI (British Standards Institution). *Methods of test for soils for civil*  
257 *engineering purposes*. **1975**, British Standard 1377. Brit. Stan. Inst., London.
- 258 3. Wenzel, W. W.; Kirchbaumer, N.; Prohaska, T.; Stingeder, G.; Lombic, L.;  
259 Adriano, D. C. Arsenic fractionation in soils using an improved sequential  
260 extraction procedure. *Anal. Chim. Acta*. **2001**, 436, 309-323.
- 261 4. Adomako, E.; Solaiman, A. R. M.; Williams, P. N.; Deacon, C. M.; Meharg, A.  
262 A. Enhanced transfer of arsenic to grain for Bangladesh grown rice compared  
263 to US and EU. *Environ. Int.* **2009**, 35, 476-479.

264

265
